# Supplementary material for: Towards IASI-New Generation (IASI-NG): impact of improved spectral resolution and radiometric noise on the retrieval of thermodynamic, chemistry and climate variables
Source: Copernicus journal article supplement (doi:10.5194/amt-7-4367-2014), 2014-12-10
Supplement: Supplementary file 1 [file amt-7-4367-2014-supplement.pdf]

Supplement of Atmos. Meas. Tech., 7, 4367–4385, 2014  
<http://www.atmos-meas-tech.net/7/4367/2014/>  
doi:10.5194/amt-7-4367-2014-supplement  
© Author(s) 2014. CC Attribution 3.0 License.

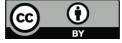

*Supplement of*

**Towards IASI-New Generation (IASI-NG): impact of improved spectral resolution and radiometric noise on the retrieval of thermodynamic, chemistry and climate variables**

C. Crevoisier et al.

*Correspondence to:* C. Crevoisier ([cyril.crevoisier@lmd.polytechnique.fr](mailto:cyril.crevoisier@lmd.polytechnique.fr))

1 **Supplementary material**

2

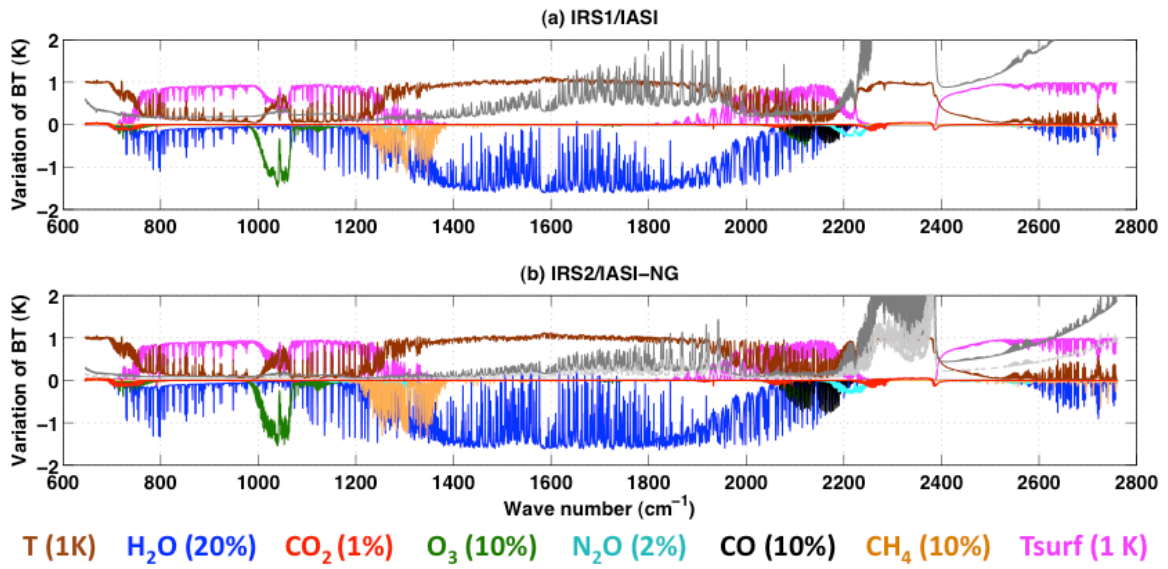

3

4 Figure S1. Same as Fig. 2 but for temperate TIGR situations.

5

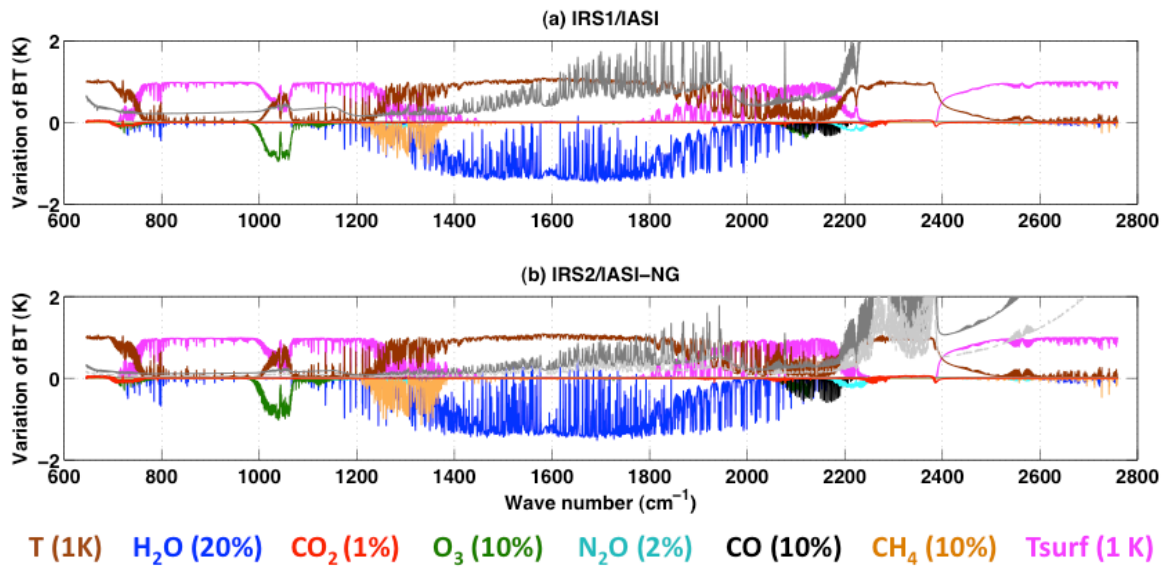

1

2 Figure S2. Same as Fig. 2 but for polar TIGR situations.
